# Supplementary material for: Tunable potential well for plasmonic trapping of metallic particles by bowtie nano-apertures
Source: PubMed Central journal article supplement (PMC5036050; doi:10.1038/srep32675), 2016-09-26
Supplement: srep32675-s1.pdf [file srep32675-s1.pdf]

# Tunable potential well for plasmonic trapping of metallic particles by bowtie nano-apertures

Yu Lu, Guangqing Du, Feng Chen\*, Qing Yang\*, Yan Ou, Jiale Yong and Xun Hou

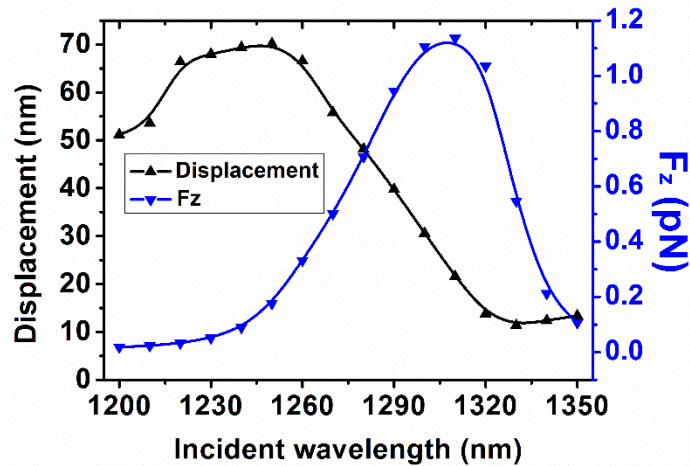

**Figure. S1.** The displacements for the maximum trapping force changing with incident wavelength ( $\blacktriangle$ ) and magnitude of the corresponding force ( $\blacktriangledown$ ). The laser influence is  $4 \times 10^8$  W/m<sup>2</sup> and the geometry parameters of the bowtie nanoaperture and particle are what applied in figure.2 in the manuscript.

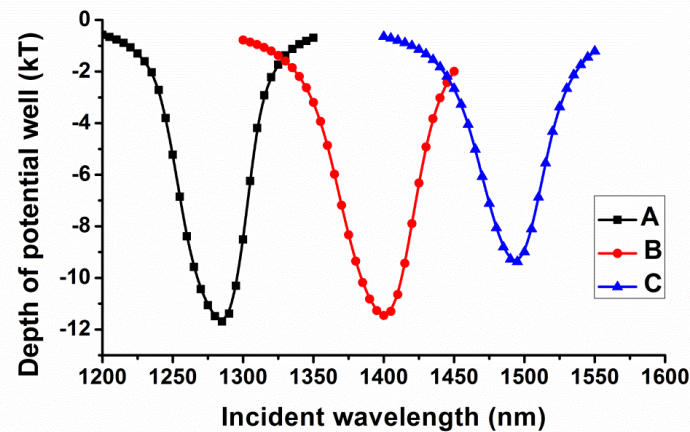

**Figure S2.** The wavelength dependent potential well depth with different bowtie nano-aperture sizes of A, B and C. A represents the parameters applied in **figure.1 (b)** in manuscript. B represents the size 1.15 times as that applied in **figure.1 (b)** and C represents the size 1.3 times as that applied in **figure.1 (b)**. The laser influence is  $4 \times 10^8$  W/m<sup>2</sup> and the diameter of nanoparticle is 50 nm.

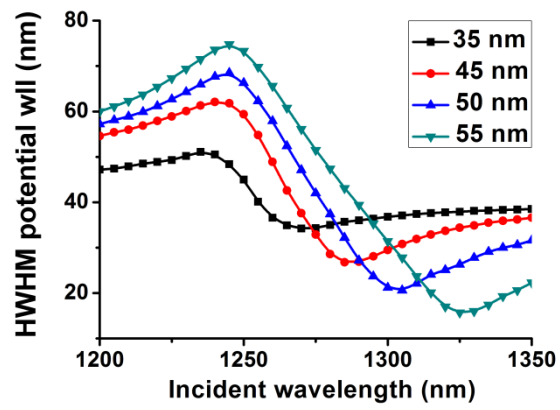

**Figure S3.** Wavelength dependent half width for half maximum (HWHM) potential well with different diameters of nanoparticles of 35 nm (■), 45 nm (●), 50 nm (▲) and 55 nm (▼). The laser fluence applied in this figure is  $4 \times 10^8 \text{ W/m}^2$
